# Supplementary material for: Knowledge, Attitude, and Practice of Dentists in India Regarding Geriatric Oral Healthcare and Polypharmacy Management: A Cross-Sectional Study
Source: Research Square preprint supplement (doi:10.21203/rs.3.rs-7976085/v1), 2025-12-01
Supplement: Supplementary file 1 [file c1df16d5416177b19a8873ff.docx]

**Table S1.** Full Demographic and Professional Characteristics of the Study Participants (n=1511)

| Characteristic | Category | Frequency (n) | Percentage (%) |
| --- | --- | --- | --- |
| Gender | Male | 527 | 34.9% |
|  | Female | 984 | 65.1% |
| Age Group | < 30 years | 302 | 20.0% |
|  | 30-40 years | 681 | 45.1% |
|  | 41-50 years | 382 | 25.3% |
|  | > 50 years | 146 | 9.7% |
| Years of Experience | < 5 years | 289 | 19.1% |
|  | 5-10 years | 452 | 29.9% |
|  | 11-20 years | 512 | 33.9% |
|  | > 20 years | 258 | 17.1% |
| Primary Practice Setting | Private Practice | 887 | 58.7% |
|  | Government Hospital | 317 | 21.0% |
|  | Academic Institution | 307 | 20.3% |
| Geographical Region | North | 378 | 25.0% |
|  | South | 423 | 28.0% |
|  | East | 257 | 17.0% |
|  | West | 453 | 30.0% |
| Highest Qualification | BDS | 905 | 59.9% |
|  | MDS | 606 | 40.1% |

**Table S2.** Detailed Awareness and Use of Geriatric Assessment Tools Among Participants (n=1511)

| Tool | Unaware | Aware but Not Using | Currently Using |
| --- | --- | --- | --- |
|  | n (%) | n (%) | n (%) |
| GOHAI (Geriatric Oral Health Assessment Index) | 1086 (71.9%) | 280 (18.5%) | 145 (9.6%) |
| Explicit Tools |  |  |  |
| • FORTA List | 1120 (74.1%) | 255 (16.9%) | 136 (9.0%) |
| • Beers Criteria | 1105 (73.1%) | 283 (18.7%) | 123 (8.1%) |
| • *Any Explicit Tool (FORTA/Beers)* | *1041 (68.9%)* | *310 (20.5%)* | *160 (10.6%)* |
| Implicit Tools |  |  |  |
| • Medication Appropriateness Index (MAI) | 995 (65.8%) | 397 (26.3%) | 119 (7.9%) |
| • ARMOR Tool | 1020 (67.5%) | 359 (23.8%) | 132 (8.7%) |
| • *Any Implicit Tool (MAI/ARMOR)* | *864 (57.2%)* | *441 (29.2%)* | *206 (13.6%)* |

**Table S3.** Training and Educational Background in Geriatric Care (n=1511)

| Educational/Training Factor | Response | Frequency (n) | Percentage (%) |
| --- | --- | --- | --- |
| Received formal training in geriatric dentistry | Yes | 280 | 18.5% |
|  | No | 1231 | 81.5% |
| Familiar with clinical guidelines for geriatric oral care | Yes | 367 | 24.3% |
|  | No | 1144 | 75.7% |
| Familiar with the term "Polypharmacy" and its implications | Yes | 1210 | 80.1% |
|  | No | 301 | 19.9% |
| Participated in continuing education on geriatrics in the last 2 years | Yes | 198 | 13.1% |
|  | No | 1313 | 86.9% |
| Feel that undergraduate training prepared them for geriatric patients | Yes | 453 | 30.0% |
|  | No | 1058 | 70.0% |

**Table S4.** Multiple Linear Regression Analysis of Factors Affecting the Total KAP Score (n=1511)

| Predictor Variable | Category | Unstandardized Coefficient (B) | Standard Error | Standardized Coefficient (β) | t-value | p-value | 95% CI for B |
| --- | --- | --- | --- | --- | --- | --- | --- |
| (Constant) |  | 85.112 | 2.345 |  | 36.290 | **<0.001** | 80.512 to 89.712 |
| Years of Experience | (Continuous) | 0.894 | 0.154 | 0.198 | 5.805 | **<0.001** | 0.592 to 1.196 |
| Practice Setting | Government vs. Private | 4.567 | 1.023 | 0.145 | 4.464 | **<0.001** | 2.560 to 6.574 |
|  | Academic vs. Private | 5.892 | 1.198 | 0.161 | 4.918 | **<0.001** | 3.541 to 8.243 |
| Geriatric Training | Yes vs. No | 8.123 | 1.456 | 0.185 | 5.579 | **<0.001** | 5.267 to 10.979 |
| Geographical Region | South vs. North | 1.234 | 0.945 | 0.045 | 1.306 | 0.192 | -0.619 to 3.087 |
|  | East vs. North | -0.567 | 1.102 | -0.018 | -0.515 | 0.607 | -2.729 to 1.595 |
|  | West vs. North | 2.101 | 0.891 | 0.081 | 2.358 | **0.018** | 0.354 to 3.848 |
| Qualification | MDS vs. BDS | 3.445 | 0.785 | 0.142 | 4.389 | **<0.001** | 1.905 to 4.985 |

**Model Summary:**

- R² = 0.227
- Adjusted R² = 0.218
- F-statistic = 24.75
- p-value for the model: **<0.001**

**Dependent Variable:** Total KAP Score (Range: 40-160)
**Reference Categories:** Practice Setting (Private), Geriatric Training (No), Geographical Region (North), Qualification (BDS).
