# Supplementary material for: Knowledge, Attitude, and Practice of Dentists in India Regarding Geriatric Oral Healthcare and Polypharmacy Management: A Cross-Sectional Study
Source: Research Square preprint supplement (doi:10.21203/rs.3.rs-7976085/v1), 2025-12-01
Supplement: Supplementary file 2 [file dad0431748565571e3b7d37d.docx]

**Survey Questionnaire**

**Introduction and Informed Consent**

Dear Participant,

You are invited to participate in a research study titled "Knowledge, Attitude, and Practice of Dentists in India Regarding Geriatric Oral Healthcare and Polypharmacy Management." This study aims to understand the current practices, awareness, and perspectives of dental practitioners in India concerning the oral healthcare of geriatric patients and the management of polypharmacy.

Your participation is entirely voluntary and anonymous. It will take approximately 10-12 minutes to complete this questionnaire. There are no right or wrong answers; we are interested in your honest opinions and experiences. By proceeding to the questions below, you indicate your informed consent to participate in this study.

Thank you for your valuable time and contribution to this research.

**Principal Investigator:**
Dr. Satya Ranjan Misra
Institute of Dental Sciences.

**Section A: Demographic and Professional Characteristics**

*Instructions: Please select the option that best describes you.*

**A1. Gender:**

- Male
- Female
- Prefer not to say

**A2. Age Group:**

- < 30 years
- 30-40 years
- 41-50 years
- > 50 years

**A3. Years of Clinical Experience:**

- < 5 years
- 5-10 years
- 11-20 years
- > 20 years

**A4. Primary Practice Setting:**

- Private Practice
- Government Hospital
- Academic Institution
- Corporate Hospital
- Other (please specify): _______________

**A5. Geographical Region of Practice:**

- North India
- South India
- East India
- West India
- Central India

**A6. Highest Qualification:**

- BDS
- MDS
- Other (please specify): _______________

**Section B: Knowledge Assessment**

*Instructions: Please answer the following questions to the best of your knowledge.*

**B1. How would you define "polypharmacy" in the context of geriatric patients?**

- Use of 2 or more medications
- Use of 5 or more medications
- Use of any unnecessary medication
- Not sure

**B2. Which of the following are common oral manifestations of polypharmacy in elderly patients? (Select all that apply)**

- Xerostomia (Dry mouth)
- Lichenoid reactions
- Gingival hyperplasia
- Taste alterations
- Not sure

**B3. Are you aware of the Geriatric Oral Health Assessment Index (GOHAI), a tool to assess oral health-related quality of life in the elderly?**

- Yes
- No

**B4. Are you aware of explicit tools to address inappropriate drug use in the elderly, such as the FORTA list or the AGS Beers Criteria®?**

- Yes, and I use them
- Yes, but I don't use them
- No, I am not aware

**B5. Are you aware of implicit tools for medication review in the elderly, such as the Medication Appropriateness Index (MAI) or the ARMOR tool?**

- Yes, and I use them
- Yes, but I don't use them
- No, I am not aware

**B6. Which of the following medications are considered potentially inappropriate in the elderly due to high risk of causing xerostomia? (Select all that apply)**

- Diuretics
- Antihistamines
- Antidepressants
- Antihypertensives
- Not sure

**B7. True or False: Age-related physiological changes can significantly alter the pharmacokinetics of drugs commonly used in dentistry.**

- True
- False
- Not sure

**Section C: Attitude Assessment**

*Instructions: Please indicate your level of agreement with the following statements using the scale below.*
*1 = Strongly Disagree, 2 = Disagree, 3 = Neutral, 4 = Agree, 5 = Strongly Agree*

| Statement | 1 | 2 | 3 | 4 | 5 |
| --- | --- | --- | --- | --- | --- |
| **C1.** I believe geriatric patients require a fundamentally different treatment approach compared to younger adults. | ○ | ○ | ○ | ○ | ○ |
| **C2.** I feel confident in managing the dental treatment of elderly patients with multiple systemic diseases. | ○ | ○ | ○ | ○ | ○ |
| **C3.** I believe that screening for polypharmacy should be a routine part of dental assessment for geriatric patients. | ○ | ○ | ○ | ○ | ○ |
| **C4.** I think that interdisciplinary collaboration with physicians is essential for managing geriatric dental patients. | ○ | ○ | ○ | ○ | ○ |
| **C5.** I believe that using standardized assessment tools (like GOHAI, Beers Criteria) would improve the quality of care I provide to elderly patients. | ○ | ○ | ○ | ○ | ○ |
| **C6.** I feel that my undergraduate training adequately prepared me to manage the oral health needs of geriatric patients. | ○ | ○ | ○ | ○ | ○ |
| **C7.** I am interested in attending continuing education programs focused on geriatric dentistry. | ○ | ○ | ○ | ○ | ○ |
| **C8.** I believe that medication-related problems (adverse effects, interactions) are a significant concern when treating elderly patients. | ○ | ○ | ○ | ○ | ○ |

**Section D: Practice Assessment**

*Instructions: Please answer the following questions based on your clinical practice.*

**D1. Do you routinely treat elderly patients (aged 60 years and above) in your practice?**

- Yes, regularly (on a daily/weekly basis)
- Yes, occasionally
- Rarely
- Never

**D2. Do you modify your treatment plan for endodontic/surgical/periodontal/prosthodontic procedures for elderly patients?**

- Yes, routinely
- Yes, sometimes
- Rarely
- Never

**D3. What are the most common oral/dental changes you observe in your elderly patients? (Select top 3)**

- Tooth loss
- Periodontitis
- Root caries
- Xerostomia (dry mouth)
- Oral mucosal lesions
- Attrition/Abrasion
- Ill-fitting dentures
- Other: _______________

**D4. What challenges do you face while communicating with a geriatric patient? (Select top 3)**

- Hearing impairment
- Visual impairment
- Cognitive impairment/Confusion
- Lack of understanding of procedures
- Anxiety and stress
- Non-adherence to treatment protocols
- Language barrier
- Other: _______________

**D5. What concerns you the most when you prescribe medications to elderly patients? (Select the single most important)**

- Adverse drug reactions
- Drug-drug interactions
- Patient compliance
- Dosage adjustment
- Cost of medication
- Other: _______________

**D6. Do you feel that geriatric patients on multiple medications are difficult to treat and need physician's referral?**

- Strongly agree
- Agree
- Neutral
- Disagree
- Strongly disagree

**D7. How often do you routinely take a detailed medication history for your geriatric patients?**

- Always
- Often
- Sometimes
- Rarely
- Never

**D8. Have you ever referred a patient to a physician/geriatrician primarily due to concerns about their medication regimen?**

- Yes, frequently
- Yes, occasionally
- Rarely
- Never

**D9. Have you received any formal training or continuing education in geriatric dentistry?**

- Yes
- No

**D10. If available, would you be willing to use a simplified, chairside guide for medication risk assessment in elderly patients?**

- Definitely yes
- Probably yes
- Not sure
- Probably not
- Definitely not

**End of Survey**

Thank you for completing this survey. Your participation is greatly appreciated and will contribute valuable insights to geriatric dental care in India.
